# Supplementary material
Source: MDPI journal article supplement (https://www.mdpi.com/1099-4300/24/2/145)
Supplement: s1 [file s1]

# Thermodynamic study of formamidinium lead iodide ( $\text{CH}_5\text{N}_2\text{PbI}_3$ ) from 5 to 357 K

Andrea Ciccio<sup>1</sup>, Alessandro Latini<sup>1</sup>, Alessio Luongo<sup>1</sup>, Natalia N. Smirnova<sup>2</sup>, Alexey V. Markin<sup>2,\*</sup> and Stefano Vecchio Cipriotti<sup>3,\*</sup>

<sup>1</sup> Department of Chemistry, Sapienza University of Rome, P.le A. Moro 5, Building CU014, I-00185 Rome,

<sup>2</sup> National Research Lobachevsky State University of Nizhny Novgorod, 23/5 Gagarin Av., 603950 Nizhny Novgorod, Russia;

<sup>3</sup> Department of Basic and Applied Science for Engineering (S.B.A.I.), Sapienza University of Rome, Via del Castro Laurenziano 7, Building RM017, I-00161 Rome, Italy; stefano.vecchio@uniroma1.it

\* Correspondence: markin@calorimetry-center.ru (A.V.M.); stefano.vecchio@uniroma1.it (S.V.C.)

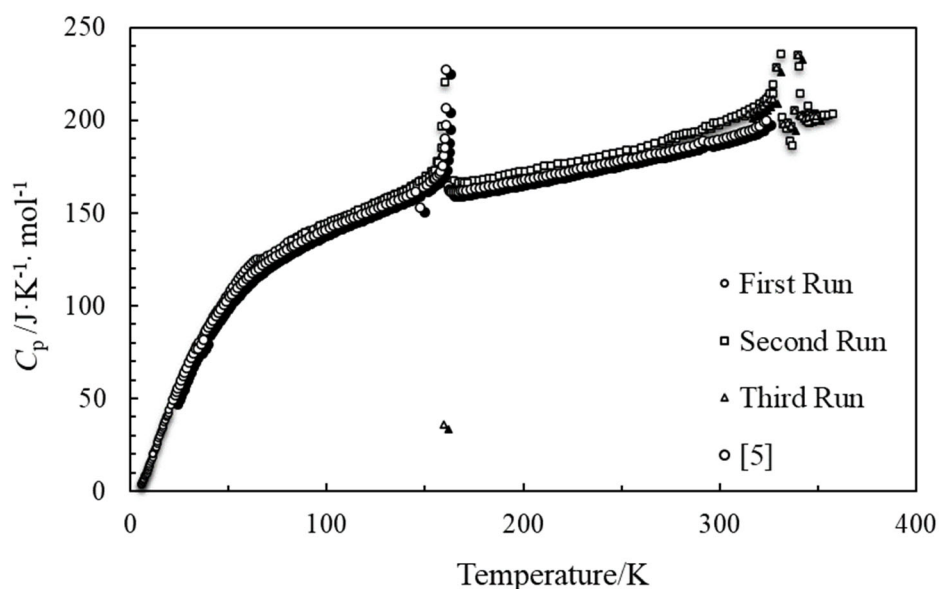

**Figure S1.** Molar heat capacities of methylammonium lead iodide (MAPI) over the range from 5 to 357 K
